# Supplementary material for: Level of pain catastrophising determines if patients with long-standing subacromial impingement benefit from more resistance exercise: predefined secondary analyses from a pragmatic randomised controlled trial (the SExSI Trial)
Source: PubMed Central journal article supplement — Br J Sports Med. 2023 Mar 10;57(13):842–8. doi: 10.1136/bjsports-2022-106383 (PMC10439263; doi:10.1136/bjsports-2022-106383), 2023-03-10
Supplement: bjsports-2022-106383supp001.pdf [file bjsports-2022-106383supp001.pdf]

## SUPPLEMENTARY FILE

Abbreviations and Units of measurement

Detailed description: assessment of pain mechanism and catastrophizing

Suppl. table 1: Missingness of data

Suppl. table 2: Mean scores for pain mechanism outcomes and between group difference

Suppl. table 3: Mean Pain Catastrophizing Scale scores and difference in mean change

Suppl. table 4: Within-group changes in SPADI and shoulder strength outcomes

Suppl. table 5: The modifying effect of central and local pain mechanisms and pain catastrophizing

Suppl. table 6: Median [IQR] for potential effect-modifiers

Suppl. figure 1: Changes in abduction strength per increase in dose and pain mechanism

Suppl. figure 2: Changes in external rotation strength per increase in dose and pain mechanism

Suppl. figure 3: Changes in SPADI per unit increase in average time spent on usual care exercise

This is a Supplementary File for the article titled:

Level of pain catastrophizing determines if patients with longstanding subacromial impingement benefit from more resistance exercise - pre-defined secondary analyses from a pragmatic randomized controlled trial (the SExSI-Trial)

Authors: Clausen MB<sup>1,2</sup>, Rathleff MS<sup>3,4</sup>, Graven-Nielsen T<sup>5</sup>, Bandholm T<sup>6,7,8</sup>, Christensen KB<sup>9</sup>, Hölmich P<sup>1</sup>, Thorborg K<sup>1,6</sup>

**Abbreviations**

PCS – Pain catastrophizing scale

PPT – Pressure pain threshold

TSP – Temporal summation of pain

CPM – Conditioned pain modulation

CPM-detection – Conditioned pain modulation detection threshold

CPM-tolerance – Conditioned pain modulation tolerance threshold

SPADI – Shoulder Pain and Disability Index

MCID – Minimal clinical important difference

cLMM – Constrained linear mixed models

VAS – Visual analogue scale

IG – Intervention group

CG – Control group

**Units of measurement**

Nm/kg – Newton-meter per kilogram bodyweight

kPa – Kilopascal

**Detailed description: assessment of pain mechanism and catastrophizing***Central pain mechanisms*

Temporal Summation of Pain (TSP) and Conditioned Pain Modulation (CPM) were measured at the ipsilateral leg using a computer-controlled cuff pressure algometer (Nocitech, Denmark and Aalborg University, Denmark). Measurements were applied to the leg to examine central pain mechanisms independently from local pain. The testing procedure started with assessment of Cuff Pressure Pain Detection threshold (PDT) and Cuff Pressure Pain Tolerance Threshold (PTT), which were then used as reference levels to measure TSP and CPM. The cuff pressure was set to increase with a rate of 1 kPa/s to a maximal pressure limit of 100 kPa. Participants were instructed to rate pain intensity continuously from the first sensation of pain, using an electronic visual analogue scale (VAS), sampled at 10 Hz, and to press a release button when the pain was no longer tolerable. Zero and 10 cm extremes on the VAS were defined as “no pain” and “maximal pain”, respectively. The pressure value when the subject reached 1 cm on the VAS was defined as the Pain Detection Threshold (PDT). The pressure recorded when the subject pressed the release button was defined as the Pressure Pain Tolerance Threshold (PTT).[1] Measures of PDT and PTT using computerized cuff algometri are found reliable (ICC 0.7 to 0.9)[2] and widely used to study central pain mechanisms in different patient populations.[1,3,4]

TSP was assessed through ten 1-second cuff pressure stimuli with 2-second inter stimulus intervals at an intensity equivalent to the recorded PTT. Participants were instructed to rate the pain intensity continuously. The VAS score at 1 s following each stimuli was automatically extracted, and TSP was quantified as the difference between a mean of the VAS scores for the last three stimulations and the mean for the first four stimulations,[2] (higher scores=more facilitated pain mechanism).

CPM-detection and CPM-tolerance were quantified as the increase in PDT and PTT, respectively, when experimental tonic pain was induced in the contralateral lower leg (conditioning stimulus), using a similar cuff. The cuff maintained a constant pressure corresponding to 75% of the PTT pressure from the initial test of PTT at the ipsilateral lower leg,[5] while a new measurement of PDT and PTT (test stimulus) was conducted in the lower leg on the same side as the shoulder pain. Higher scores indicate less facilitated pain mechanisms.

### *Local pain sensitivity*

Local pain sensitivity was quantified through measurement of Pressure Pain Threshold (PPT) at four standardized body sites using a hand-held pressure algometer (Somedic Sales AB, Sweden). The 1 cm<sup>2</sup> stimulation area was placed perpendicular to the skin, and pressure applied at a rate of 30 kPa/s. The subjects were instructed to indicate when the sensation changed from a sensation of pressure to the first sensation of pain (lower scores=more pain sensitivity). PPTs were assessed at the side of the painful shoulder, at: I) the deltoid muscle, II) the supraspinatus muscle,[6] III) the infraspinatus muscle[6] and IV) at the site of worst pain as described by the patient. PPT was measured twice at each site, with the average of measurements for each site calculated and used for analyses. Similar measures of PPT in the arm have demonstrated good reliability (ICC 0.87).[2] As pre-specified[7] only PPT for site 1 (deltoid muscle) was included as potential effect-modifier.

### *Pain catastrophizing*

Pain catastrophizing was quantified using the Danish version of the Pain Catastrophizing Scale (PCS), which consists of 13 items.[8] Each item is scored on a 5-point Likert scale (0-4 points, 4 = worst) and combined to a total score (0 to 52, higher scores equals more catastrophizing). The Danish version is found valid and reliable ( $\alpha=0.91-0.94$ ) in patients with chronic pain.[8]

### *References*

- 1 Graven-Nielsen T, Wodehouse T, Langford RM, *et al.* Normalization of widespread hyperesthesia and facilitated spatial summation of deep-tissue pain in knee osteoarthritis patients after knee replacement. *Arthritis Rheum* 2012;**64**:2907–16. doi:10.1002/art.34466
- 2 Graven-Nielsen T, Vaegter HB, Finocchietti S, *et al.* Assessment of musculoskeletal pain sensitivity and temporal summation by cuff pressure algometry: a reliability study. *Pain* 2015;**156**:2193–202. doi:10.1097/j.pain.0000000000000294
- 3 Skou ST, Graven-Nielsen T, Rasmussen S, *et al.* Widespread sensitization in patients with chronic pain after revision total knee arthroplasty. *Pain* 2013;**154**:1588–94. doi:10.1016/j.pain.2013.04.033
- 4 Rathleff MS, Petersen KK, Arendt-Nielsen L, *et al.* Impaired Conditioned Pain Modulation in Young Female Adults with Long-Standing Patellofemoral Pain: A Single Blinded Cross-Sectional Study. *Pain Med* Published Online First: 14 December 2015. doi:10.1093/pm/pnv017

- 5 Graven-Nielsen T, Izumi M, Petersen KK, *et al.* User-independent assessment of conditioning pain modulation by cuff pressure algometry. *Eur J Pain Lond Engl* 2017;**21**:552–61. doi:10.1002/ejp.958
- 6 Hidalgo-Lozano A, Fernández-de-las-Peñas C, Alonso-Blanco C, *et al.* Muscle trigger points and pressure pain hyperalgesia in the shoulder muscles in patients with unilateral shoulder impingement: a blinded, controlled study. *Exp Brain Res* 2010;**202**:915–25. doi:10.1007/s00221-010-2196-4
- 7 Clausen MB, Bandholm T, Rathleff MS, *et al.* The Strengthening Exercises in Shoulder Impingement trial (The SExSI-trial) investigating the effectiveness of a simple add-on shoulder strengthening exercise programme in patients with long-lasting subacromial impingement syndrome: Study protocol for a pragmatic, assessor blinded, parallel-group, randomised, controlled trial. *Trials* 2018;**19**:154. doi:10.1186/s13063-018-2509-7
- 8 Kjøgx H, Zachariae R, Pfeiffer-Jensen M, *et al.* Pain frequency moderates the relationship between pain catastrophizing and pain. *Front Psychol* 2014;**5**:1421. doi:10.3389/fpsyg.2014.01421

**Suppl. table 1.** Missingness of data for each outcome at baseline, week 5, week 10, and four months.

|                        | Baseline |    | Week 5 |    | Week 10 |    | 4 months |    |
|------------------------|----------|----|--------|----|---------|----|----------|----|
|                        | IG       | CG | IG     | CG | IG      | CG | IG       | CG |
| PCS                    | 0        | 0  | 32     | 15 | 38      | 19 | 31       | 20 |
| TSP                    | -        | -  | 37     | 18 | 42      | 21 | 36       | 22 |
| CPM-tolerance          | -        | -  | 35     | 19 | 42      | 24 | 37       | 21 |
| CP-detection           | -        | -  | 35     | 19 | 43      | 25 | 37       | 22 |
| PPT-deltoid            | -        | -  | 33     | 15 | 41      | 19 | 35       | 20 |
| PPT-supraspinatus      | -        | -  | 33     | 15 | 41      | 19 | 35       | 20 |
| PPT-infraspinatus      | -        | -  | 33     | 15 | 41      | 19 | 35       | 20 |
| PPT-site of worst pain | -        | -  | 36     | 21 | 43      | 22 | 38       | 25 |

**Suppl. table 2.** Mean scores for pain mechanism outcomes at 5, 10 and 16 weeks and between group difference at each follow-up time-point

|                            | Control Group            |      | Intervention Group |      | Between-group difference |               |        |
|----------------------------|--------------------------|------|--------------------|------|--------------------------|---------------|--------|
|                            | Mean                     | SD   | Mean               | SD   | Mean diff.               | 95%CI         | p=     |
|                            | Difference in mean score |      |                    |      |                          |               |        |
| TSP 5w                     | 2.6                      | 1.7  | 3.0                | 1.6  | 0.5                      | (-0.1 to 1.1) | 0.0892 |
| TSP 10w                    | 2.5                      | 1.6  | 2.7                | 1.5  | 0.2                      | (-0.4 to 0.8) | 0.5229 |
| TSP 16w                    | 3.0                      | 1.9  | 2.9                | 1.8  | -0.1                     | (-0.7 to 0.5) | 0.8052 |
| CPM-tolerance 5w           | 3.1                      | 10.9 | 5.1                | 9.7  | 2.0                      | (-1.9 to 5.8) | 0.3155 |
| CPM-tolerance 10w          | 4.9                      | 12.5 | 4.7                | 13.6 | -0.2                     | (-4.5 to 4.1) | 0.9206 |
| CPM-tolerance 16w          | 4.5                      | 11.2 | 4.7                | 12.4 | 0.2                      | (-3.8 to 4.2) | 0.9211 |
| CPM-detection 5w           | 1.1                      | 8.5  | 2.9                | 9.7  | 1.8                      | (-0.7 to 4.3) | 0.1603 |
| CPM-detection 10w          | 3.7                      | 6.3  | 3.5                | 6.0  | -0.1                     | (-2.5 to 2.2) | 0.9055 |
| CPM-detection 16w          | 3.9                      | 7.4  | 3.4                | 6.3  | -0.5                     | (-2.8 to 1.9) | 0.6795 |
| PPT-deltoid 5w             | 236                      | 172  | 227                | 168  | -9                       | (-57 to 39)   | 0.7106 |
| PPT-deltoid 10w            | 219                      | 158  | 211                | 141  | -8                       | (-55 to 39)   | 0.7414 |
| PPT-deltoid 16w            | 216                      | 150  | 206                | 153  | -10                      | (-57 to 37)   | 0.6760 |
| PPT-supraspinatus 5w       | 251                      | 165  | 229                | 165  | -22                      | (-69 to 25)   | 0.3603 |
| PPT-supraspinatus 10w      | 242                      | 148  | 241                | 150  | -2                       | (-49 to 46)   | 0.9448 |
| PPT-supraspinatus 16w      | 239                      | 166  | 208                | 142  | -31                      | (-79 to 16)   | 0.1980 |
| PPT-infraspinatus 5w       | 238                      | 156  | 206                | 128  | -32                      | (-73 to 9)    | 0.1291 |
| PPT-infraspinatus 10w      | 236                      | 144  | 227                | 138  | -9                       | (-51 to 33)   | 0.6801 |
| PPT-infraspinatus 16w      | 226                      | 135  | 200                | 123  | -26                      | (-67 to 15)   | 0.2155 |
| PPT-site of worst pain 5w  | 167                      | 114  | 161                | 116  | -6                       | (-43 to 31)   | 0.7386 |
| PPT-site of worst pain 10w | 166                      | 119  | 149                | 100  | -17                      | (-53 to 19)   | 0.3639 |
| PPT-site of worst pain 16w | 163                      | 130  | 156                | 120  | -6                       | (-45 to 32)   | 0.7542 |

**Suppl. table 3.** Mean Pain Catastrophizing Scale scores with standard deviation for each group at baseline and 5, 10 and 16 weeks, and difference in mean change between each follow-up and from baseline to 16 weeks

| Mean score   | CG     |    | IG     |    | Difference in mean change |                     |
|--------------|--------|----|--------|----|---------------------------|---------------------|
|              | Mean   | SD | Mean   | SD | Mean diff. (95%CI)        | p=                  |
| PCS baseline | 18 ±13 |    | 14 ±11 |    | PCS baseline to 5w        | 2 (-1 to 4) 0.1598  |
| PCS 5w       | 13 ±13 |    | 11 ±10 |    | PCS 5w to 10 w            | 1 (-2 to 3) 0.7031  |
| PCS 10w      | 12 ±12 |    | 10 ±10 |    | PCS 10w to 16w            | -1 (-4 to 2) 0.4256 |
| PCS 16w      | 11 ±12 |    | 9 ±10  |    | PCS baseline to 16w       | 1 (-2 to 4) 0.4226  |

**Suppl. table 4.** Within-group changes in SPADI and shoulder strength outcomes stratified by potential effect-modifiers for the IG and CG, respectively

|                                       | Baseline to 5 weeks       |                          | 5 to 10 weeks            |                          | 10 to 16 weeks          |                          | Baseline to 16 weeks     |                          |
|---------------------------------------|---------------------------|--------------------------|--------------------------|--------------------------|-------------------------|--------------------------|--------------------------|--------------------------|
|                                       | CG                        | IG                       | CG                       | IG                       | CG                      | IG                       | CG                       | IG                       |
| <b>SPADI, 0 (best) to 100 (worst)</b> |                           |                          |                          |                          |                         |                          |                          |                          |
| TSP higher                            | -18.3<br>(-24 to -13)     | -16.3<br>(-22 to -11)    | -0.5<br>(-7 to 6)        | -5.0<br>(-11 to 1)       | -3.3<br>(-10 to 3)      | -2.3<br>(-9 to 4)        | -22.1<br>(-28 to -16)    | -23.6<br>(-30 to -18)    |
| TSP lower                             | -15.2<br>(-20 to -10)     | -15.6<br>(-22 to -9)     | -3.4<br>(-9 to 2)        | -5.1<br>(-12 to 2)       | -4.3<br>(-10 to 1)      | -0.5<br>(-8 to 7)        | -22.9<br>(-28 to -18)    | -21.2<br>(-28 to -14)    |
| CPM-tolerance higher                  | -17.5<br>(-23 to -12)     | -16.1<br>(-22 to -11)    | -2.0<br>(-7 to 4)        | -6.4<br>(-13 to 0)       | -6.7<br>(-12 to -1)     | -3.5<br>(-10 to 3)       | -26.2<br>(-32 to -21)    | -26.1<br>(-32 to -20)    |
| CPM-tolerance lower                   | -12.4<br>(-18 to -7)      | -13.9<br>(-20 to -8)     | -2.9<br>(-8 to 3)        | -4.9<br>(-12 to 2)       | -1.7<br>(-7 to 4)       | 2.2<br>(-5 to 9)         | -17.0<br>(-23 to -11)    | -16.6<br>(-23 to -10)    |
| CPM-detection higher                  | -16.7<br>(-22 to -11)     | -17.1<br>(-23 to -12)    | -2.6<br>(-8 to 3)        | -4.4<br>(-10 to 2)       | -5.7<br>(-12 to 0)      | 0.2<br>(-6 to 7)         | -25.0<br>(-31 to -19)    | -21.2<br>(-27 to -15)    |
| CPM detection lower                   | -13.3<br>(-19 to -8)      | -12.9<br>(-19 to -7)     | -2.6<br>(-8 to 3)        | -8.8<br>(-16 to -2)      | -3.2<br>(-9 to 2)       | -0.6<br>(-7 to 6)        | -19.2<br>(-25 to -14)    | -22.3<br>(-29 to -16)    |
| PPT-deltoid higher                    | -16.1<br>(-21 to -11)     | -18.2<br>(-24 to -12)    | -1.2<br>(-7 to 4)        | -7.9<br>(-14 to -1)      | -5.2<br>(-10 to 0)      | -0.7<br>(-7 to 6)        | -22.5<br>(-28 to -17)    | -26.7<br>(-33 to -20)    |
| PPT-deltoid lower                     | -15.1<br>(-20 to -10)     | -12.4<br>(-18 to -7)     | -3.1<br>(-9 to 2)        | -5.0<br>(-11 to 1)       | -3.5<br>(-9 to 2)       | -2.2<br>(-8 to 4)        | -21.8<br>(-27 to -16)    | -19.6<br>(-26 to -14)    |
| PCS higher                            | -17.9<br>(-23 to -12)     | -11.0<br>(-17 to -5)     | -1.5<br>(-7 to 4)        | -1.8<br>(-9 to 5)        | -3.5<br>(-9 to 2)       | -1.3<br>(-10 to 7)       | -22.9<br>(-29 to -17)    | -14.1<br>(-22 to -6)     |
| PCS lower                             | -15.3<br>(-20 to -11)     | -19.2<br>(-24 to -14)    | -2.3<br>(-7 to 2)        | -8.6<br>(-13 to -4)      | -5.2<br>(-10 to 0)      | -2.8<br>(-7 to 2)        | -22.9<br>(-28 to -18)    | -30.6<br>(-35 to -26)    |
| <b>Abduction MVC, Nm/kg</b>           |                           |                          |                          |                          |                         |                          |                          |                          |
| TSP higher                            | 0.01<br>(-0.02 to 0.04)   | 0.00<br>(-0.03 to 0.03)  | -0.01<br>(-0.04 to 0.03) | 0.02<br>(-0.01 to 0.05)  | 0.04<br>(0.01 to 0.08)  | 0.02<br>(-0.01 to 0.06)  | 0.05<br>(0.02 to 0.08)   | 0.04<br>(0.01 to 0.07)   |
| TSP lower                             | -0.01<br>(-0.04 to 0.03)  | 0.05<br>(0 to 0.09)      | 0.02<br>(-0.02 to 0.05)  | -0.05<br>(-0.1 to 0)     | 0.02<br>(-0.02 to 0.06) | 0.01<br>(-0.04 to 0.07)  | 0.03<br>(-0.01 to 0.06)  | 0.01<br>(-0.04 to 0.06)  |
| CPM-tolerance higher                  | 0.01<br>(-0.02 to 0.05)   | 0.03<br>(-0.01 to 0.07)  | 0.00<br>(-0.04 to 0.03)  | 0.00<br>(-0.05 to 0.03)  | 0.02<br>(-0.02 to 0.06) | 0.02<br>(-0.02 to 0.06)  | 0.03<br>(-0.01 to 0.07)  | 0.04<br>(0 to 0.08)      |
| CPM-tolerance lower                   | -0.03<br>(-0.06 to 0.01)  | -0.02<br>(-0.05 to 0.01) | 0.02<br>(-0.01 to 0.05)  | 0.00<br>(-0.04 to 0.04)  | 0.03<br>(-0.01 to 0.06) | 0.01<br>(-0.03 to 0.05)  | 0.02<br>(-0.01 to 0.05)  | -0.01<br>(-0.05 to 0.03) |
| CPM-detection higher                  | 0.00<br>(-0.04 to 0.04)   | 0.01<br>(-0.02 to 0.05)  | 0.02<br>(-0.02 to 0.06)  | -0.02<br>(-0.06 to 0.02) | 0.01<br>(-0.03 to 0.05) | 0.01<br>(-0.04 to 0.05)  | 0.03<br>(-0.01 to 0.07)  | 0.00<br>(-0.04 to 0.04)  |
| CPM detection lower                   | -0.01<br>(-0.04 to 0.01)  | 0.00<br>(-0.03 to 0.03)  | 0.01<br>(-0.02 to 0.04)  | 0.01<br>(-0.03 to 0.04)  | 0.03<br>(0 to 0.06)     | 0.03<br>(-0.01 to 0.07)  | 0.02<br>(-0.01 to 0.05)  | 0.03<br>(0 to 0.07)      |
| PPT-deltoid higher                    | -0.02<br>(-0.05 to 0.01)  | 0.03<br>(0 to 0.07)      | 0.00<br>(-0.03 to 0.04)  | -0.05<br>(-0.09 to 0)    | 0.05<br>(0.01 to 0.08)  | 0.05<br>(0.01 to 0.10)   | 0.03<br>(-0.01 to 0.06)  | 0.04<br>(0 to 0.08)      |
| PPT-deltoid lower                     | 0.02<br>(-0.01 to 0.05)   | -0.01<br>(-0.04 to 0.02) | 0.01<br>(-0.02 to 0.04)  | 0.02<br>(-0.01 to 0.05)  | 0.00<br>(-0.03 to 0.03) | 0.00<br>(-0.04 to 0.03)  | 0.03<br>(0 to 0.06)      | 0.00<br>(-0.03 to 0.03)  |
| PCS higher                            | 0.01<br>(-0.02 to 0.04)   | -0.02<br>(-0.06 to 0.02) | 0.00<br>(-0.03 to 0.04)  | 0.01<br>(-0.04 to 0.06)  | 0.01<br>(-0.03 to 0.04) | 0.01<br>(-0.03 to 0.06)  | 0.02<br>(-0.02 to 0.06)  | 0.00<br>(-0.04 to 0.05)  |
| PCS lower                             | -0.01<br>(-0.04 to 0.02)  | 0.04<br>(0 to 0.07)      | 0.02<br>(-0.01 to 0.05)  | -0.02<br>(-0.06 to 0.02) | 0.05<br>(0.01 to 0.08)  | 0.03<br>(0 to 0.07)      | 0.05<br>(0.02 to 0.08)   | 0.05<br>(0.02 to 0.08)   |
| <b>External rotation MVC, Nm/kg</b>   |                           |                          |                          |                          |                         |                          |                          |                          |
| TSP higher                            | -0.01<br>(-0.03 to 0)     | -0.01<br>(-0.02 to 0)    | 0.00<br>(-0.01 to 0.02)  | 0.01<br>(0 to 0.02)      | 0.01<br>(-0.01 to 0.02) | 0.00<br>(-0.01 to 0.02)  | -0.01<br>(-0.02 to 0.01) | 0.00<br>(-0.01 to 0.02)  |
| TSP lower                             | 0.00<br>(-0.02 to 0.01)   | 0.01<br>(0 to 0.03)      | 0.01<br>(0 to 0.02)      | 0.00<br>(-0.01 to 0.02)  | 0.00<br>(-0.01 to 0.01) | -0.01<br>(-0.03 to 0.01) | 0.01<br>(-0.01 to 0.02)  | 0.01<br>(-0.01 to 0.03)  |
| CPM-tolerance higher                  | 0.00<br>(-0.01 to 0.02)   | 0.01<br>(-0.01 to 0.02)  | 0.01<br>(-0.01 to 0.02)  | 0.00<br>(-0.01 to 0.02)  | 0.00<br>(-0.02 to 0.01) | 0.00<br>(-0.01 to 0.02)  | 0.01<br>(-0.01 to 0.02)  | 0.01<br>(0 to 0.03)      |
| CPM-tolerance lower                   | -0.02<br>(-0.03 to -0.01) | -0.01<br>(-0.02 to 0.01) | 0.00<br>(-0.01 to 0.02)  | 0.01<br>(0 to 0.03)      | 0.01<br>(0 to 0.02)     | -0.01<br>(-0.02 to 0.01) | 0.00<br>(-0.02 to 0.01)  | 0.00<br>(-0.02 to 0.02)  |
| CPM-detection higher                  | 0.00<br>(-0.02 to 0.01)   | -0.01<br>(-0.02 to 0.01) | 0.01<br>(0 to 0.02)      | 0.01<br>(-0.01 to 0.02)  | 0.00<br>(-0.01 to 0.01) | -0.01<br>(-0.03 to 0)    | 0.01<br>(-0.01 to 0.02)  | -0.01<br>(-0.02 to 0)    |
| CPM detection lower                   | -0.01<br>(-0.02 to 0)     | 0.00<br>(-0.01 to 0.02)  | 0.00<br>(-0.01 to 0.01)  | 0.01<br>(-0.01 to 0.02)  | 0.01<br>(-0.01 to 0.02) | 0.01<br>(0 to 0.03)      | 0.00<br>(-0.01 to 0.01)  | 0.02<br>(0.01 to 0.04)   |
| PPT-deltoid higher                    | -0.01<br>(-0.03 to 0)     | 0.01<br>(-0.01 to 0.02)  | 0.01<br>(0 to 0.02)      | 0.00<br>(-0.01 to 0.02)  | 0.00<br>(-0.01 to 0.01) | 0.01<br>(-0.01 to 0.02)  | -0.01<br>(-0.02 to 0.01) | 0.02<br>(0 to 0.04)      |
| PPT-deltoid lower                     | 0.00<br>(-0.01 to 0.01)   | 0.00<br>(-0.02 to 0.01)  | 0.00<br>(-0.01 to 0.01)  | 0.01<br>(-0.01 to 0.02)  | 0.00<br>(-0.01 to 0.02) | -0.01<br>(-0.02 to 0.01) | 0.01<br>(-0.01 to 0.02)  | 0.00<br>(-0.02 to 0.01)  |
| PCS higher                            | -0.01<br>(-0.02 to 0.01)  | -0.01<br>(-0.02 to 0.01) | 0.01<br>(0 to 0.02)      | 0.01<br>(-0.01 to 0.03)  | 0.00<br>(-0.01 to 0.01) | 0.00<br>(-0.02 to 0.01)  | 0.00<br>(-0.01 to 0.02)  | 0.00<br>(-0.02 to 0.02)  |
| PCS lower                             | -0.01<br>(-0.02 to 0)     | 0.01<br>(-0.01 to 0.02)  | 0.00<br>(-0.01 to 0.01)  | 0.00<br>(-0.01 to 0.02)  | 0.01<br>(-0.01 to 0.02) | 0.01<br>(-0.01 to 0.02)  | 0.00<br>(-0.02 to 0.01)  | 0.01<br>(0 to 0.03)      |



**Suppl. table 5.** The modifying effect of central and local pain mechanisms and pain catastrophizing on between-group differences for changes in SPADI and shoulder strength outcomes.

|                                       | Baseline to 5 weeks |              | 5 to 10 weeks |              | 10 to 16 weeks |              | Baseline to 16 weeks |              | Interaction<br><i>p</i> = |
|---------------------------------------|---------------------|--------------|---------------|--------------|----------------|--------------|----------------------|--------------|---------------------------|
|                                       | Mean                | 95%CI        | Mean          | 95%CI        | Mean           | 95%CI        | Mean                 | 95%CI        |                           |
| <b>SPADI, 0 (best) to 100 (worst)</b> |                     |              |               |              |                |              |                      |              |                           |
| TSP higher                            | 2                   | (-6 10)      | -4            | (-13 4)      | 1              | (-8 10)      | -1                   | (-10 7)      | 0.2986                    |
| TSP lower                             | 0                   | (-8 7)       | -2            | (-11 7)      | 4              | (-5 13)      | 2                    | (-7 10)      |                           |
| CPM-tolerance higher                  | 1                   | (-6 9)       | -4            | (-13 4)      | 3              | (-5 11)      | 0                    | (-8 8)       | 0.4801                    |
| CPM-tolerance lower                   | -1                  | (-9 6)       | -2            | (-11 7)      | 4              | (-5 13)      | 0                    | (-8 9)       |                           |
| CPM-detection higher                  | 0                   | (-8 7)       | -2            | (-10 6)      | 6              | (-3 15)      | 4                    | (-4 12)      | 0.1186                    |
| CPM detection lower                   | 0                   | (-7 8)       | -6            | (-15 3)      | 3              | (-6 11)      | -3                   | (-11 5)      |                           |
| PPT-deltoid higher                    | -2                  | (-10 5)      | -7            | (-15 2)      | 5              | (-4 13)      | -4                   | (-12 4)      | 0.1356                    |
| PPT-deltoid lower                     | 3                   | (-5 10)      | -2            | (-10 6)      | 1              | (-7 10)      | 2                    | (-6 10)      |                           |
| PCS higher                            | 7                   | (-1 15)      | 0             | (-9 9)       | 2              | (-8 12)      | 9                    | (-1 18)      | 0.0029                    |
| PCS lower                             | -4                  | (-11 3)      | -6            | (-13 0)      | 2              | (-4 9)       | -8                   | (-14 -1)     |                           |
| <b>Abduction MVC, Nm/kg</b>           |                     |              |               |              |                |              |                      |              |                           |
| TSP higher                            | -0.01               | (-0.06 0.03) | 0.02          | (-0.02 0.07) | -0.02          | (-0.06 0.03) | -0.01                | (-0.05 0.03) | 0.4216                    |
| TSP lower                             | 0.05                | (0.00 0.11)  | -0.06         | (-0.13 0.00) | -0.01          | (-0.07 0.06) | -0.02                | (-0.08 0.04) |                           |
| CPM-tolerance higher                  | 0.02                | (-0.03 0.07) | -0.01         | (-0.06 0.05) | 0.00           | (-0.06 0.05) | 0.01                 | (-0.05 0.06) | 0.1552                    |
| CPM-tolerance lower                   | 0.01                | (-0.04 0.05) | -0.02         | (-0.07 0.03) | -0.02          | (-0.07 0.03) | -0.03                | (-0.08 0.02) |                           |
| CPM-detection higher                  | 0.01                | (-0.04 0.07) | -0.04         | (-0.09 0.02) | -0.01          | (-0.07 0.05) | -0.03                | (-0.09 0.02) | 0.1276                    |
| CPM detection lower                   | 0.01                | (-0.03 0.06) | 0.00          | (-0.05 0.04) | 0.00           | (-0.05 0.05) | 0.01                 | (-0.04 0.06) |                           |
| PPT-deltoid higher                    | 0.05                | (0.00 0.11)  | -0.05         | (-0.11 0.00) | 0.01           | (-0.05 0.07) | 0.01                 | (-0.04 0.07) | 0.1468                    |
| PPT-deltoid lower                     | -0.03               | (-0.07 0.01) | 0.01          | (-0.04 0.05) | 0.00           | (-0.05 0.04) | -0.03                | (-0.07 0.02) |                           |
| PCS higher                            | -0.03               | (-0.08 0.02) | 0.01          | (-0.05 0.07) | 0.01           | (-0.05 0.07) | -0.02                | (-0.08 0.04) | 0.3712                    |
| PCS lower                             | 0.05                | (0.00 0.09)  | -0.04         | (-0.09 0.01) | -0.01          | (-0.06 0.04) | -0.01                | (-0.05 0.04) |                           |
| <b>External rotation MVC, Nm/kg</b>   |                     |              |               |              |                |              |                      |              |                           |
| TSP higher                            | 0.00                | (-0.01 0.02) | 0.01          | (-0.01 0.02) | 0.00           | (-0.02 0.02) | 0.01                 | (-0.01 0.03) | 0.3161                    |
| TSP lower                             | 0.02                | (0.00 0.04)  | -0.01         | (-0.03 0.02) | -0.01          | (-0.03 0.01) | 0.00                 | (-0.02 0.02) |                           |
| CPM-tolerance higher                  | 0.00                | (-0.02 0.02) | 0.00          | (-0.02 0.02) | 0.00           | (-0.02 0.02) | 0.00                 | (-0.02 0.02) | 0.4914                    |
| CPM-tolerance lower                   | 0.01                | (-0.01 0.03) | 0.01          | (-0.01 0.03) | -0.01          | (-0.03 0.01) | 0.00                 | (-0.02 0.02) |                           |
| CPM-detection higher                  | 0.00                | (-0.02 0.02) | 0.00          | (-0.02 0.02) | -0.01          | (-0.03 0.01) | -0.02                | (-0.04 0.00) | 0.0015                    |
| CPM detection lower                   | 0.01                | (0.00 0.03)  | 0.01          | (-0.01 0.03) | 0.01           | (-0.02 0.03) | 0.03                 | (0.01 0.05)  |                           |
| PPT-deltoid higher                    | 0.02                | (0.00 0.04)  | -0.01         | (-0.03 0.01) | 0.01           | (-0.01 0.03) | 0.02                 | (0.00 0.04)  | 0.0095                    |
| PPT-deltoid lower                     | 0.00                | (-0.02 0.01) | 0.01          | (-0.01 0.03) | -0.01          | (-0.03 0.01) | -0.01                | (-0.03 0.01) |                           |
| PCS higher                            | 0.00                | (-0.02 0.02) | 0.00          | (-0.02 0.02) | 0.00           | (-0.03 0.02) | 0.00                 | (-0.03 0.02) | 0.0823                    |
| PCS lower                             | 0.01                | (0.00 0.03)  | 0.00          | (-0.02 0.02) | 0.00           | (-0.02 0.02) | 0.02                 | (0.00 0.03)  |                           |

**Suppl. table 6.** Median [IQR] for potential effect-modifiers:

|               | All               | Low strata      | High strata    |
|---------------|-------------------|-----------------|----------------|
| PCS           | 16 [8.67;27]      | 9 [3;13]        | 27 [20;34.5]   |
| TSP           | 2.7 [1.4;3.9]     | 1.4 [0.8;2.1]   | 3.9 [3.3;4.8]  |
| CPM-tolerance | 1.5 [-2.15;6.275] | -2.1 [-7.0;0.2] | 6.1 [4.1;11.9] |
| CPM-detection | 3.3 [-2.0;9.5]    | -2.1 [-7.1;0.6] | 9.6 [6.2;17.3] |
| PPT-deltoid   | 176 [119;288]     | 120 [86;152]    | 288 [228;349]  |

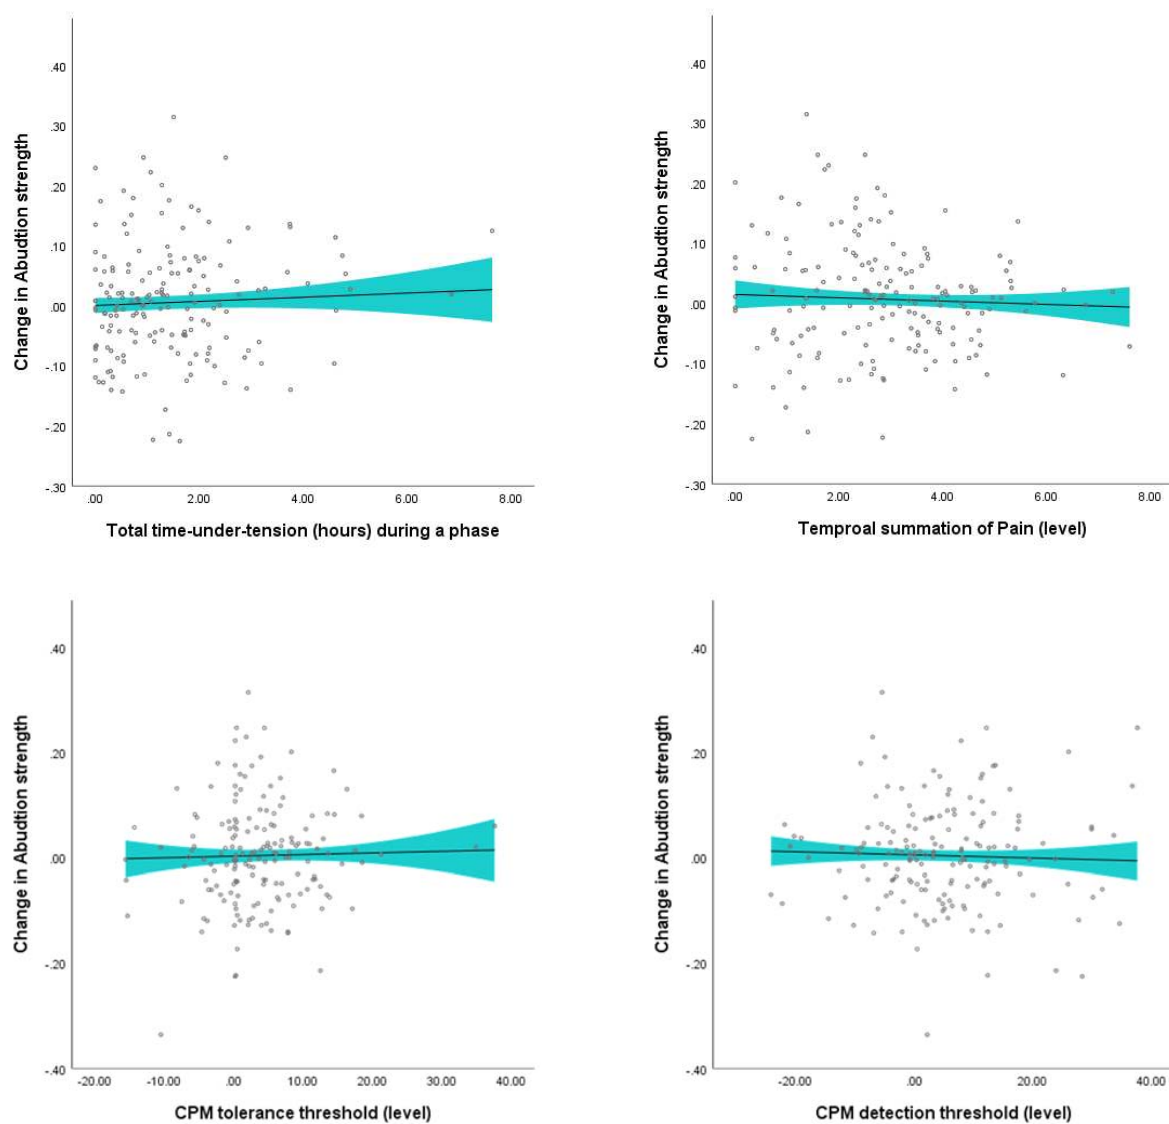

**Suppl. figure 1.** Changes in abduction strength during a phase (baseline to 5 weeks, 5 to 10 weeks and 10 to 16 weeks) per unit increase in A) exercise dose, B) level of temporal summation of pain, C) level of CPM tolerance threshold and D) level of CPM detection threshold for the respective phase. The curve is a smooth curve fitted to the predicted values obtained from the linear mixed model and fitted using a kernel density estimator. The shaded represents a smoothing of the 95% confidence limits of individual prediction intervals

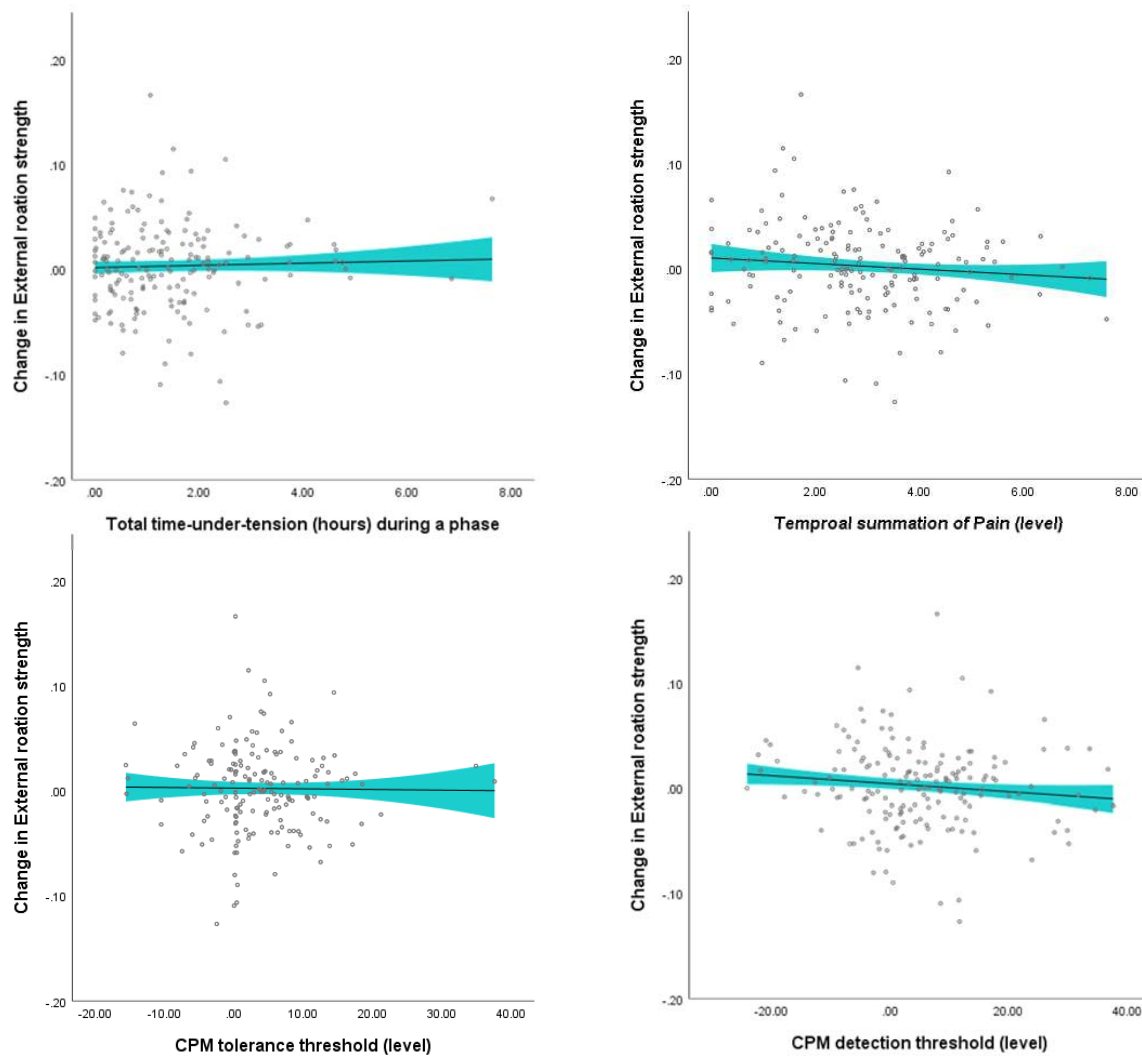

**Suppl. figure 2.** Changes in external rotation strength during a phase (baseline to 5 weeks, 5 to 10 weeks and 10 to 16 weeks) per unit increase in A) exercise dose, B) level of temporal summation of pain, C) level of CPM tolerance threshold and D) level of CPM detection threshold for the respective phase. The curve is a smooth curve fitted to the predicted values obtained from the linear mixed model and fitted using a kernel density estimator. The shaded represents a smoothing of the 95% confidence limits of individual prediction intervals

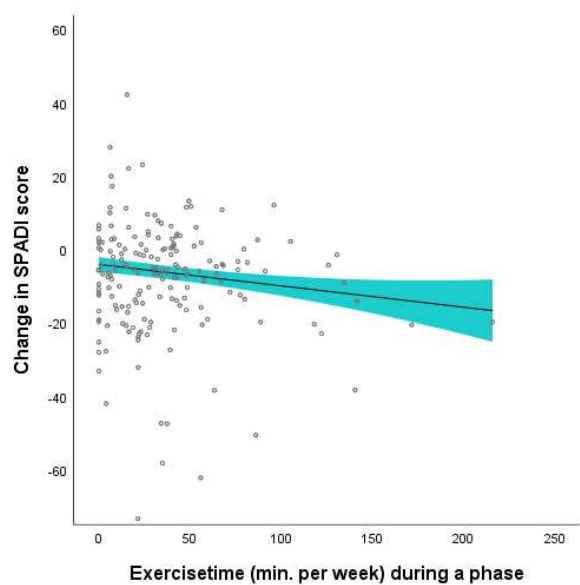

**Suppl. figure 3.** Changes in SPADI during a phase (baseline to 5 weeks, 5 to 10 weeks and 10 to 16 weeks) per unit increase in average time spent on usual care exercise the respective phase. The curve is a smooth curve fitted to the predicted values obtained from the linear mixed model and fitted using a kernel density estimator. The shaded represents a smoothing of the 95% confidence limits of individual prediction intervals.
